# Supplementary material
Source: publisher figshare collection journal article supplement (https://acs.figshare.com/ndownloader/files/5119660)
Supplement: Supplementary file 1 [file 5119660]

 
data_compound1 
 
_audit_creation_method            SHELXL-97 
_chemical_name_systematic 
; 
 ? 
; 
_chemical_name_common             ? 
_chemical_melting_point           ? 
_chemical_formula_moiety          ? 
_chemical_formula_sum 
 'C112 H108 Fe2 N4 O12' 
_chemical_formula_weight          1813.72 
 
loop_ 
 _atom_type_symbol 
 _atom_type_description 
 _atom_type_scat_dispersion_real 
 _atom_type_scat_dispersion_imag 
 _atom_type_scat_source 
 'C'  'C'   0.0033   0.0016 
 'International Tables Vol C Tables 4.2.6.8 and 6.1.1.4' 
 'H'  'H'   0.0000   0.0000 
 'International Tables Vol C Tables 4.2.6.8 and 6.1.1.4' 
 'N'  'N'   0.0061   0.0033 
 'International Tables Vol C Tables 4.2.6.8 and 6.1.1.4' 
 'O'  'O'   0.0106   0.0060 
 'International Tables Vol C Tables 4.2.6.8 and 6.1.1.4' 
 'Fe'  'Fe'   0.3463   0.8444 
 'International Tables Vol C Tables 4.2.6.8 and 6.1.1.4' 
 
_symmetry_cell_setting            triclinic 
_symmetry_space_group_name_H-M    P-1 
 
loop_ 
 _symmetry_equiv_pos_as_xyz 
 'x, y, z' 
 '-x, -y, -z' 
 
_cell_length_a                    16.1429(17) 
_cell_length_b                    16.8733(18) 
_cell_length_c                    17.3090(19) 
_cell_angle_alpha                 89.578(2) 
_cell_angle_beta                  89.332(2) 
_cell_angle_gamma                 88.507(2) 
_cell_volume                      4712.7(9) 
_cell_formula_units_Z             2 
_cell_measurement_temperature     173(2) 
_cell_measurement_reflns_used     ? 
_cell_measurement_theta_min       ? 
_cell_measurement_theta_max       ? 
 
_exptl_crystal_description        block 
_exptl_crystal_colour             red-pink 
_exptl_crystal_size_max           0.10 
_exptl_crystal_size_mid           0.10 
_exptl_crystal_size_min           0.05 
_exptl_crystal_density_meas       ? 
_exptl_crystal_density_diffrn     1.278 
_exptl_crystal_density_method     'not measured' 
_exptl_crystal_F_000              1912 
_exptl_absorpt_coefficient_mu     0.374 
_exptl_absorpt_correction_type    Empirical 
_exptl_absorpt_correction_T_min   0.857084 
_exptl_absorpt_correction_T_max   1 
_exptl_absorpt_process_details    Sadabs 
 
_exptl_special_details 
; 
 ? 
; 
 
_diffrn_ambient_temperature       173(2) 
_diffrn_radiation_wavelength      0.71073 
_diffrn_radiation_type            MoK\a 
_diffrn_radiation_source          'fine-focus sealed tube' 
_diffrn_radiation_monochromator   graphite 
_diffrn_measurement_device_type   ? 
_diffrn_measurement_method        ? 
_diffrn_detector_area_resol_mean  ? 
_diffrn_standards_number          ? 
_diffrn_standards_interval_count  ? 
_diffrn_standards_interval_time   ? 
_diffrn_standards_decay_%         ? 
_diffrn_reflns_number             35063 
_diffrn_reflns_av_R_equivalents   0.0401 
_diffrn_reflns_av_sigmaI/netI     0.0661 
_diffrn_reflns_limit_h_min        -19 
_diffrn_reflns_limit_h_max        19 
_diffrn_reflns_limit_k_min        -20 
_diffrn_reflns_limit_k_max        20 
_diffrn_reflns_limit_l_min        -20 
_diffrn_reflns_limit_l_max        20 
_diffrn_reflns_theta_min          1.18 
_diffrn_reflns_theta_max          25.00 
_reflns_number_total              16460 
_reflns_number_gt                 11656 
_reflns_threshold_expression      >2sigma(I) 
 
_computing_data_collection        ? 
_computing_cell_refinement        ? 
_computing_data_reduction         ? 
_computing_structure_solution     'SHELXS-97 (Sheldrick, 1990)' 
_computing_structure_refinement   'SHELXL-97 (Sheldrick, 1997)' 
_computing_molecular_graphics     ? 
_computing_publication_material   ? 
 
_refine_special_details 
; 
 Refinement of F^2^ against ALL reflections.  The weighted R-factor wR and 
 goodness of fit S are based on F^2^, conventional R-factors R are based 
 on F, with F set to zero for negative F^2^. The threshold expression of 
 F^2^ > 2sigma(F^2^) is used only for calculating R-factors(gt) etc. and is 
 not relevant to the choice of reflections for refinement.  R-factors based 
 on F^2^ are statistically about twice as large as those based on F, and R- 
 factors based on ALL data will be even larger. 
; 
 
_refine_ls_structure_factor_coef  Fsqd  
_refine_ls_matrix_type            full 
_refine_ls_weighting_scheme       calc  
_refine_ls_weighting_details 
 'calc w=1/[\s^2^(Fo^2^)+(0.1175P)^2^+9.7738P] where P=(Fo^2^+2Fc^2^)/3' 
_atom_sites_solution_primary      direct 
_atom_sites_solution_secondary    difmap 
_atom_sites_solution_hydrogens    geom 
_refine_ls_hydrogen_treatment     constr 
_refine_ls_extinction_method      none 
_refine_ls_extinction_coef        ? 
_refine_ls_number_reflns          16460 
_refine_ls_number_parameters      1026 
_refine_ls_number_restraints      0 
_refine_ls_R_factor_all           0.1188 
_refine_ls_R_factor_gt            0.0861 
_refine_ls_wR_factor_ref          0.2457 
_refine_ls_wR_factor_gt           0.2215 
_refine_ls_goodness_of_fit_ref    1.056 
_refine_ls_restrained_S_all       1.056 
_refine_ls_shift/su_max           0.001 
_refine_ls_shift/su_mean          0.000 
 
loop_ 
 _atom_site_label 
 _atom_site_type_symbol 
 _atom_site_fract_x 
 _atom_site_fract_y 
 _atom_site_fract_z 
 _atom_site_U_iso_or_equiv 
 _atom_site_adp_type 
 _atom_site_occupancy 
 _atom_site_symmetry_multiplicity 
 _atom_site_calc_flag 
 _atom_site_refinement_flags 
 _atom_site_disorder_assembly 
 _atom_site_disorder_group 
C1 C 0.7520(4) 0.6482(4) 0.8331(3) 0.0507(15) Uani 1 1 d . . . 
H1 H 0.7493 0.6048 0.7987 0.061 Uiso 1 1 calc R . . 
C2 C 0.7529(5) 0.6324(4) 0.9113(4) 0.0653(19) Uani 1 1 d . . . 
H2 H 0.7504 0.5795 0.9301 0.078 Uiso 1 1 calc R . . 
C3 C 0.7572(6) 0.6936(4) 0.9605(4) 0.075(2) Uani 1 1 d . . . 
C4 C 0.7594(6) 0.7697(4) 0.9311(4) 0.083(3) Uani 1 1 d . . . 
H4 H 0.7618 0.8138 0.9648 0.099 Uiso 1 1 calc R . . 
C5 C 0.7581(5) 0.7810(4) 0.8511(3) 0.0598(18) Uani 1 1 d . . . 
H5 H 0.7596 0.8335 0.8308 0.072 Uiso 1 1 calc R . . 
C6 C 0.7596(9) 0.6794(5) 1.0425(4) 0.127(5) Uani 1 1 d . . . 
C7 C 0.6866(5) 0.7596(5) 0.3616(4) 0.074(2) Uani 1 1 d . . . 
H7 H 0.6386 0.7397 0.3865 0.089 Uiso 1 1 calc R . . 
C8 C 0.6822(6) 0.7799(6) 0.2839(5) 0.098(3) Uani 1 1 d . . . 
H8 H 0.6320 0.7752 0.2563 0.118 Uiso 1 1 calc R . . 
C9 C 0.7543(6) 0.8075(4) 0.2474(4) 0.070(2) Uani 1 1 d . . . 
C10 C 0.8224(6) 0.8084(5) 0.2869(4) 0.087(3) Uani 1 1 d . . . 
H10 H 0.8726 0.8233 0.2622 0.105 Uiso 1 1 calc R . . 
C11 C 0.8228(5) 0.7877(5) 0.3647(4) 0.070(2) Uani 1 1 d . . . 
H11 H 0.8736 0.7887 0.3917 0.084 Uiso 1 1 calc R . . 
C12 C 0.7527(7) 0.8344(5) 0.1683(4) 0.103(3) Uani 1 1 d . . . 
C100 C 0.7316(3) 0.8982(3) 0.6193(3) 0.0350(12) Uani 1 1 d . . . 
C101 C 0.7233(3) 0.9875(3) 0.6199(4) 0.0434(14) Uani 1 1 d . . . 
C102 C 0.7546(3) 1.0292(3) 0.6833(4) 0.0493(15) Uani 1 1 d . . . 
C103 C 0.7460(4) 1.1116(4) 0.6842(5) 0.064(2) Uani 1 1 d . . . 
H103 H 0.7652 1.1403 0.7272 0.077 Uiso 1 1 calc R . . 
C104 C 0.7096(4) 1.1521(4) 0.6224(5) 0.070(2) Uani 1 1 d . . . 
H104 H 0.7061 1.2084 0.6228 0.084 Uiso 1 1 calc R . . 
C105 C 0.6788(4) 1.1121(4) 0.5613(5) 0.067(2) Uani 1 1 d . . . 
H105 H 0.6533 1.1408 0.5202 0.080 Uiso 1 1 calc R . . 
C106 C 0.6844(3) 1.0293(3) 0.5585(4) 0.0489(15) Uani 1 1 d . . . 
C107 C 0.6434(3) 0.9916(3) 0.4928(4) 0.0515(16) Uani 1 1 d . . . 
C108 C 0.6530(4) 1.0206(4) 0.4181(5) 0.068(2) Uani 1 1 d . . . 
H108 H 0.6909 1.0617 0.4084 0.081 Uiso 1 1 calc R . . 
C109 C 0.6092(5) 0.9915(5) 0.3584(5) 0.080(2) Uani 1 1 d . . . 
H109 H 0.6180 1.0124 0.3080 0.096 Uiso 1 1 calc R . . 
C110 C 0.5520(4) 0.9321(4) 0.3690(4) 0.0616(18) Uani 1 1 d . . . 
C111 C 0.5436(4) 0.9023(4) 0.4428(4) 0.0506(15) Uani 1 1 d . . . 
H111 H 0.5064 0.8605 0.4519 0.061 Uiso 1 1 calc R . . 
C112 C 0.5871(3) 0.9310(3) 0.5035(4) 0.0417(13) Uani 1 1 d . . . 
H112 H 0.5788 0.9093 0.5537 0.050 Uiso 1 1 calc R . . 
C113 C 0.5012(5) 0.9022(5) 0.3033(4) 0.084(2) Uani 1 1 d . . . 
H11A H 0.4986 0.8443 0.3066 0.126 Uiso 1 1 calc R . . 
H11B H 0.5269 0.9174 0.2540 0.126 Uiso 1 1 calc R . . 
H11C H 0.4450 0.9254 0.3067 0.126 Uiso 1 1 calc R . . 
C114 C 0.8002(4) 0.9927(3) 0.7497(4) 0.0510(15) Uani 1 1 d . . . 
C115 C 0.7767(5) 1.0102(4) 0.8255(5) 0.071(2) Uani 1 1 d . . . 
H115 H 0.7279 1.0416 0.8348 0.086 Uiso 1 1 calc R . . 
C116 C 0.8217(6) 0.9833(5) 0.8859(5) 0.089(3) Uani 1 1 d . . . 
H116 H 0.8044 0.9970 0.9369 0.107 Uiso 1 1 calc R . . 
C117 C 0.8932(6) 0.9357(5) 0.8752(5) 0.083(2) Uani 1 1 d . . . 
C118 C 0.9172(5) 0.9175(4) 0.8000(4) 0.0679(19) Uani 1 1 d . . . 
H118 H 0.9656 0.8856 0.7907 0.081 Uiso 1 1 calc R . . 
C119 C 0.8704(4) 0.9458(3) 0.7383(4) 0.0523(15) Uani 1 1 d . . . 
H119 H 0.8872 0.9324 0.6871 0.063 Uiso 1 1 calc R . . 
C120 C 0.9437(7) 0.9071(7) 0.9420(5) 0.119(4) Uani 1 1 d . . . 
H12A H 0.9105 0.9113 0.9896 0.179 Uiso 1 1 calc R . . 
H12B H 0.9929 0.9394 0.9463 0.179 Uiso 1 1 calc R . . 
H12C H 0.9608 0.8516 0.9338 0.179 Uiso 1 1 calc R . . 
C200 C 0.5946(3) 0.7249(3) 0.5999(3) 0.0286(10) Uani 1 1 d . . . 
C201 C 0.5038(3) 0.7059(3) 0.6067(3) 0.0319(11) Uani 1 1 d . . . 
C202 C 0.4637(3) 0.6668(3) 0.5469(3) 0.0370(12) Uani 1 1 d . . . 
C203 C 0.3806(3) 0.6463(4) 0.5564(4) 0.0489(14) Uani 1 1 d . . . 
H203 H 0.3533 0.6199 0.5161 0.059 Uiso 1 1 calc R . . 
C204 C 0.3383(3) 0.6642(4) 0.6242(4) 0.0515(15) Uani 1 1 d . . . 
H204 H 0.2826 0.6484 0.6309 0.062 Uiso 1 1 calc R . . 
C205 C 0.3763(3) 0.7048(3) 0.6821(4) 0.0477(14) Uani 1 1 d . . . 
H205 H 0.3459 0.7182 0.7277 0.057 Uiso 1 1 calc R . . 
C206 C 0.4596(3) 0.7267(3) 0.6746(3) 0.0377(12) Uani 1 1 d . . . 
C207 C 0.4945(3) 0.7730(3) 0.7389(3) 0.0383(12) Uani 1 1 d . . . 
C208 C 0.5274(4) 0.8472(3) 0.7269(4) 0.0497(15) Uani 1 1 d . . . 
H208 H 0.5311 0.8674 0.6756 0.060 Uiso 1 1 calc R . . 
C209 C 0.5548(4) 0.8921(4) 0.7861(4) 0.0597(17) Uani 1 1 d . . . 
H209 H 0.5772 0.9426 0.7752 0.072 Uiso 1 1 calc R . . 
C210 C 0.5504(5) 0.8655(4) 0.8617(4) 0.0654(19) Uani 1 1 d . . . 
C211 C 0.5189(5) 0.7914(5) 0.8742(4) 0.076(2) Uani 1 1 d . . . 
H211 H 0.5165 0.7707 0.9254 0.091 Uiso 1 1 calc R . . 
C212 C 0.4907(4) 0.7464(4) 0.8140(4) 0.0598(17) Uani 1 1 d . . . 
H212 H 0.4681 0.6960 0.8249 0.072 Uiso 1 1 calc R . . 
C213 C 0.5793(6) 0.9161(6) 0.9284(5) 0.102(3) Uani 1 1 d . . . 
H21A H 0.6013 0.8816 0.9695 0.153 Uiso 1 1 calc R . . 
H21B H 0.5325 0.9481 0.9485 0.153 Uiso 1 1 calc R . . 
H21C H 0.6228 0.9513 0.9099 0.153 Uiso 1 1 calc R . . 
C214 C 0.5042(3) 0.6420(3) 0.4732(3) 0.0375(12) Uani 1 1 d . . . 
C215 C 0.4707(4) 0.6640(4) 0.4028(4) 0.0539(16) Uani 1 1 d . . . 
H215 H 0.4229 0.6980 0.4020 0.065 Uiso 1 1 calc R . . 
C216 C 0.5047(4) 0.6380(5) 0.3342(4) 0.0675(19) Uani 1 1 d . . . 
H216 H 0.4800 0.6544 0.2870 0.081 Uiso 1 1 calc R . . 
C217 C 0.5739(4) 0.5887(5) 0.3325(4) 0.0630(18) Uani 1 1 d . . . 
C218 C 0.6076(4) 0.5660(4) 0.4026(4) 0.0566(16) Uani 1 1 d . . . 
H218 H 0.6557 0.5324 0.4033 0.068 Uiso 1 1 calc R . . 
C219 C 0.5728(4) 0.5912(3) 0.4712(3) 0.0460(14) Uani 1 1 d . . . 
H219 H 0.5965 0.5733 0.5185 0.055 Uiso 1 1 calc R . . 
C220 C 0.6135(6) 0.5601(6) 0.2578(4) 0.092(3) Uani 1 1 d . . . 
H22A H 0.5779 0.5755 0.2144 0.139 Uiso 1 1 calc R . . 
H22B H 0.6204 0.5023 0.2595 0.139 Uiso 1 1 calc R . . 
H22C H 0.6677 0.5841 0.2510 0.139 Uiso 1 1 calc R . . 
C300 C 0.7758(3) 0.5911(3) 0.5917(3) 0.0267(10) Uani 1 1 d . . . 
C301 C 0.7866(3) 0.5029(3) 0.5793(3) 0.0277(10) Uani 1 1 d . . . 
C302 C 0.7554(3) 0.4495(3) 0.6345(3) 0.0323(11) Uani 1 1 d . . . 
C303 C 0.7679(3) 0.3679(3) 0.6225(3) 0.0400(12) Uani 1 1 d . . . 
H303 H 0.7487 0.3313 0.6602 0.048 Uiso 1 1 calc R . . 
C304 C 0.8078(4) 0.3400(3) 0.5568(4) 0.0464(14) Uani 1 1 d . . . 
H304 H 0.8154 0.2845 0.5494 0.056 Uiso 1 1 calc R . . 
C305 C 0.8364(3) 0.3922(3) 0.5023(3) 0.0398(13) Uani 1 1 d . . . 
H305 H 0.8630 0.3722 0.4570 0.048 Uiso 1 1 calc R . . 
C306 C 0.8275(3) 0.4735(3) 0.5117(3) 0.0318(11) Uani 1 1 d . . . 
C307 C 0.8661(3) 0.5248(3) 0.4523(3) 0.0348(11) Uani 1 1 d . . . 
C308 C 0.9256(3) 0.5790(3) 0.4707(3) 0.0410(13) Uani 1 1 d . . . 
H308 H 0.9389 0.5866 0.5235 0.049 Uiso 1 1 calc R . . 
C309 C 0.9658(4) 0.6220(3) 0.4151(4) 0.0541(16) Uani 1 1 d . . . 
H309 H 1.0069 0.6580 0.4298 0.065 Uiso 1 1 calc R . . 
C310 C 0.9472(5) 0.6137(4) 0.3371(4) 0.070(2) Uani 1 1 d . . . 
C311 C 0.8888(6) 0.5604(5) 0.3189(4) 0.078(2) Uani 1 1 d . . . 
H311 H 0.8757 0.5530 0.2662 0.093 Uiso 1 1 calc R . . 
C312 C 0.8477(4) 0.5167(4) 0.3747(4) 0.0591(17) Uani 1 1 d . . . 
H312 H 0.8065 0.4809 0.3597 0.071 Uiso 1 1 calc R . . 
C313 C 0.7057(3) 0.4729(3) 0.7039(3) 0.0349(11) Uani 1 1 d . . . 
C314 C 0.6348(3) 0.5217(3) 0.6972(3) 0.0398(12) Uani 1 1 d . . . 
H314 H 0.6206 0.5437 0.6483 0.048 Uiso 1 1 calc R . . 
C315 C 0.5854(4) 0.5384(4) 0.7606(3) 0.0496(15) Uani 1 1 d . . . 
H315 H 0.5376 0.5719 0.7549 0.060 Uiso 1 1 calc R . . 
C316 C 0.6043(4) 0.5071(4) 0.8327(4) 0.0536(16) Uani 1 1 d . . . 
C317 C 0.6741(4) 0.4590(4) 0.8393(3) 0.0538(16) Uani 1 1 d . . . 
H317 H 0.6883 0.4373 0.8883 0.065 Uiso 1 1 calc R . . 
C318 C 0.7238(4) 0.4420(3) 0.7758(3) 0.0447(13) Uani 1 1 d . . . 
H318 H 0.7713 0.4082 0.7818 0.054 Uiso 1 1 calc R . . 
C319 C 0.5504(5) 0.5284(5) 0.9025(4) 0.080(2) Uani 1 1 d . . . 
H31A H 0.5663 0.4946 0.9464 0.120 Uiso 1 1 calc R . . 
H31B H 0.4921 0.5204 0.8903 0.120 Uiso 1 1 calc R . . 
H31C H 0.5580 0.5841 0.9157 0.120 Uiso 1 1 calc R . . 
C320 C 0.9945(7) 0.6592(5) 0.2769(5) 0.112(4) Uani 1 1 d . . . 
H32A H 1.0469 0.6310 0.2650 0.168 Uiso 1 1 calc R . . 
H32B H 1.0059 0.7121 0.2964 0.168 Uiso 1 1 calc R . . 
H32C H 0.9614 0.6642 0.2299 0.168 Uiso 1 1 calc R . . 
C400 C 0.9134(3) 0.7647(3) 0.6010(3) 0.0276(10) Uani 1 1 d . . . 
C401 C 1.0057(3) 0.7784(3) 0.6067(3) 0.0287(10) Uani 1 1 d . . . 
C402 C 1.0497(3) 0.7442(3) 0.6695(3) 0.0348(11) Uani 1 1 d . . . 
C403 C 1.1344(3) 0.7575(3) 0.6750(3) 0.0431(13) Uani 1 1 d . . . 
H403 H 1.1643 0.7356 0.7173 0.052 Uiso 1 1 calc R . . 
C404 C 1.1755(3) 0.8019(3) 0.6202(4) 0.0452(14) Uani 1 1 d . . . 
H404 H 1.2334 0.8095 0.6243 0.054 Uiso 1 1 calc R . . 
C405 C 1.1321(3) 0.8351(3) 0.5598(3) 0.0401(13) Uani 1 1 d . . . 
H405 H 1.1604 0.8661 0.5225 0.048 Uiso 1 1 calc R . . 
C406 C 1.0473(3) 0.8240(3) 0.5520(3) 0.0335(11) Uani 1 1 d . . . 
C407 C 1.0054(3) 0.8670(3) 0.4864(3) 0.0353(11) Uani 1 1 d . . . 
C408 C 0.9348(3) 0.9144(3) 0.4976(3) 0.0347(11) Uani 1 1 d . . . 
H408 H 0.9099 0.9176 0.5476 0.042 Uiso 1 1 calc R . . 
C409 C 0.9004(3) 0.9567(3) 0.4372(3) 0.0427(13) Uani 1 1 d . . . 
H409 H 0.8512 0.9876 0.4462 0.051 Uiso 1 1 calc R . . 
C410 C 0.9353(4) 0.9556(3) 0.3642(3) 0.0462(14) Uani 1 1 d . . . 
C411 C 1.0063(4) 0.9087(3) 0.3530(3) 0.0509(15) Uani 1 1 d . . . 
H411 H 1.0315 0.9063 0.3032 0.061 Uiso 1 1 calc R . . 
C412 C 1.0410(4) 0.8655(3) 0.4130(3) 0.0440(13) Uani 1 1 d . . . 
H412 H 1.0900 0.8342 0.4039 0.053 Uiso 1 1 calc R . . 
C413 C 1.0131(3) 0.6897(3) 0.7281(3) 0.0344(11) Uani 1 1 d . . . 
C414 C 1.0174(4) 0.7055(4) 0.8063(4) 0.0539(15) Uani 1 1 d . . . 
H414 H 1.0391 0.7543 0.8227 0.065 Uiso 1 1 calc R . . 
C415 C 0.9907(5) 0.6515(5) 0.8605(4) 0.0670(19) Uani 1 1 d . . . 
H415 H 0.9942 0.6638 0.9138 0.080 Uiso 1 1 calc R . . 
C416 C 0.9590(4) 0.5797(4) 0.8389(4) 0.0609(18) Uani 1 1 d . . . 
C417 C 0.9529(4) 0.5647(4) 0.7612(4) 0.0581(17) Uani 1 1 d . . . 
H417 H 0.9298 0.5165 0.7449 0.070 Uiso 1 1 calc R . . 
C418 C 0.9797(3) 0.6187(3) 0.7064(3) 0.0425(13) Uani 1 1 d . . . 
H418 H 0.9751 0.6068 0.6531 0.051 Uiso 1 1 calc R . . 
C419 C 0.9338(6) 0.5179(6) 0.8990(5) 0.098(3) Uani 1 1 d . . . 
H41A H 0.9766 0.4757 0.9016 0.147 Uiso 1 1 calc R . . 
H41B H 0.8810 0.4951 0.8842 0.147 Uiso 1 1 calc R . . 
H41C H 0.9274 0.5430 0.9496 0.147 Uiso 1 1 calc R . . 
C420 C 0.8975(5) 1.0034(4) 0.2987(4) 0.0656(19) Uani 1 1 d . . . 
H42A H 0.9146 1.0586 0.3022 0.098 Uiso 1 1 calc R . . 
H42B H 0.8369 1.0016 0.3023 0.098 Uiso 1 1 calc R . . 
H42C H 0.9163 0.9812 0.2492 0.098 Uiso 1 1 calc R . . 
Fe1 Fe 0.75318(4) 0.75133(4) 0.52284(4) 0.02746(19) Uani 1 1 d . . . 
Fe2 Fe 0.75436(4) 0.73835(4) 0.68276(4) 0.02618(19) Uani 1 1 d . . . 
N1 N 0.7549(3) 0.7214(3) 0.8031(2) 0.0361(10) Uani 1 1 d . . . 
N2 N 0.7612(10) 0.6644(5) 1.1062(5) 0.195(7) Uani 1 1 d . . . 
N3 N 0.7547(3) 0.7666(3) 0.4029(2) 0.0371(10) Uani 1 1 d . . . 
N4 N 0.7518(8) 0.8598(5) 0.1055(4) 0.155(5) Uani 1 1 d . . . 
O1 O 0.7184(2) 0.86069(19) 0.6807(2) 0.0357(8) Uani 1 1 d . . . 
O2 O 0.7532(2) 0.86672(19) 0.5556(2) 0.0350(8) Uani 1 1 d . . . 
O3 O 0.63788(19) 0.70934(19) 0.65869(19) 0.0306(7) Uani 1 1 d . . . 
O4 O 0.6219(2) 0.75141(19) 0.5371(2) 0.0332(8) Uani 1 1 d . . . 
O5 O 0.75336(19) 0.63219(18) 0.53398(18) 0.0293(7) Uani 1 1 d . . . 
O6 O 0.79026(19) 0.61792(18) 0.65722(18) 0.0291(7) Uani 1 1 d . . . 
O7 O 0.87145(19) 0.77155(18) 0.66284(19) 0.0302(7) Uani 1 1 d . . . 
O8 O 0.8844(2) 0.74858(18) 0.53639(19) 0.0308(7) Uani 1 1 d . . . 
O1D O 0.7613(3) 0.4622(3) 0.0302(2) 0.117(2) Uiso 1 1 d G . . 
C1D C 0.8267(3) 0.4590(3) 0.0844(3) 0.146(5) Uiso 1 1 d G . . 
H1D1 H 0.8429 0.5133 0.0979 0.175 Uiso 1 1 calc R . . 
H1D2 H 0.8756 0.4305 0.0620 0.175 Uiso 1 1 calc R . . 
C2D C 0.7981(3) 0.4184(3) 0.1513(2) 0.157(5) Uiso 1 1 d G . . 
H2D1 H 0.8333 0.3705 0.1610 0.188 Uiso 1 1 calc R . . 
H2D2 H 0.8006 0.4533 0.1969 0.188 Uiso 1 1 calc R . . 
C3D C 0.7150(3) 0.3966(2) 0.1385(2) 0.170(6) Uiso 1 1 d G . . 
H3D1 H 0.6778 0.4210 0.1780 0.205 Uiso 1 1 calc R . . 
H3D2 H 0.7104 0.3383 0.1420 0.205 Uiso 1 1 calc R . . 
C4D C 0.6923(3) 0.4237(2) 0.0636(2) 0.202(7) Uiso 1 1 d G . . 
H4D1 H 0.6441 0.4611 0.0672 0.243 Uiso 1 1 calc R . . 
H4D2 H 0.6768 0.3784 0.0313 0.243 Uiso 1 1 calc R . . 
O1S O 0.7711(4) 0.1052(3) 0.0542(3) 0.330(9) Uiso 1 1 d G . . 
C1S C 0.6991(4) 0.0602(2) 0.0673(3) 0.273(11) Uiso 1 1 d G . . 
H1S1 H 0.6544 0.0783 0.0322 0.327 Uiso 1 1 calc R . . 
H1S2 H 0.7116 0.0034 0.0573 0.327 Uiso 1 1 calc R . . 
C2S C 0.6736(4) 0.0708(2) 0.1454(3) 0.221(8) Uiso 1 1 d G . . 
H2S1 H 0.6739 0.0191 0.1728 0.266 Uiso 1 1 calc R . . 
H2S2 H 0.6167 0.0940 0.1477 0.266 Uiso 1 1 calc R . . 
C3S C 0.7299(4) 0.1224(2) 0.1807(3) 0.232(8) Uiso 1 1 d G . . 
H3S1 H 0.7571 0.0954 0.2250 0.278 Uiso 1 1 calc R . . 
H3S2 H 0.6999 0.1704 0.1999 0.278 Uiso 1 1 calc R . . 
C4S C 0.7901(4) 0.1437(3) 0.1243(3) 0.270(10) Uiso 1 1 d G . . 
H4S1 H 0.7890 0.2019 0.1165 0.324 Uiso 1 1 calc R . . 
H4S2 H 0.8462 0.1269 0.1416 0.324 Uiso 1 1 calc R . . 
O1T O 0.1489(4) 0.7791(5) 0.1232(4) 0.378(11) Uiso 1 1 d G . . 
C1T C 0.1234(4) 0.7165(5) 0.0752(4) 0.279(11) Uiso 1 1 d G . . 
H1T1 H 0.1519 0.7195 0.0243 0.335 Uiso 1 1 calc R . . 
H1T2 H 0.1377 0.6646 0.0993 0.335 Uiso 1 1 calc R . . 
C2T C 0.0363(4) 0.7245(5) 0.0658(4) 0.233(9) Uiso 1 1 d G . . 
H2T1 H 0.0089 0.6765 0.0853 0.279 Uiso 1 1 calc R . . 
H2T2 H 0.0231 0.7313 0.0104 0.279 Uiso 1 1 calc R . . 
C3T C 0.0079(4) 0.7920(6) 0.1080(5) 0.346(15) Uiso 1 1 d G . . 
H3T1 H -0.0189 0.8311 0.0728 0.415 Uiso 1 1 calc R . . 
H3T2 H -0.0331 0.7762 0.1478 0.415 Uiso 1 1 calc R . . 
C4T C 0.0775(4) 0.8257(5) 0.1435(4) 0.290(12) Uiso 1 1 d G . . 
H4T1 H 0.0840 0.8810 0.1254 0.348 Uiso 1 1 calc R . . 
H4T2 H 0.0698 0.8261 0.2003 0.348 Uiso 1 1 calc R . . 
O1U O 0.5836(6) 0.1928(5) 0.8742(3) 0.445(14) Uiso 1 1 d G . . 
C1U C 0.4988(6) 0.2151(5) 0.8647(3) 0.298(12) Uiso 1 1 d G . . 
H1U1 H 0.4869 0.2239 0.8093 0.358 Uiso 1 1 calc R . . 
H1U2 H 0.4630 0.1725 0.8844 0.358 Uiso 1 1 calc R . . 
C2U C 0.4831(6) 0.2859(6) 0.9067(3) 0.285(11) Uiso 1 1 d G . . 
H2U1 H 0.4635 0.3288 0.8715 0.342 Uiso 1 1 calc R . . 
H2U2 H 0.4396 0.2773 0.9466 0.342 Uiso 1 1 calc R . . 
C3U C 0.5580(6) 0.3074(6) 0.9422(3) 0.212(8) Uiso 1 1 d G . . 
H3U1 H 0.5505 0.3091 0.9990 0.255 Uiso 1 1 calc R . . 
H3U2 H 0.5744 0.3606 0.9239 0.255 Uiso 1 1 calc R . . 
C4U C 0.6201(6) 0.2499(6) 0.9221(3) 0.324(14) Uiso 1 1 d G . . 
H4U1 H 0.6424 0.2240 0.9692 0.389 Uiso 1 1 calc R . . 
H4U2 H 0.6663 0.2754 0.8942 0.389 Uiso 1 1 calc R . . 
 
loop_ 
 _atom_site_aniso_label 
 _atom_site_aniso_U_11 
 _atom_site_aniso_U_22 
 _atom_site_aniso_U_33 
 _atom_site_aniso_U_23 
 _atom_site_aniso_U_13 
 _atom_site_aniso_U_12 
C1 0.068(4) 0.049(4) 0.036(3) 0.001(3) -0.001(3) -0.016(3) 
C2 0.101(6) 0.056(4) 0.040(3) 0.005(3) 0.000(4) -0.018(4) 
C3 0.119(7) 0.056(4) 0.051(4) 0.001(3) 0.007(4) -0.016(4) 
C4 0.156(8) 0.061(5) 0.033(3) -0.008(3) 0.002(4) -0.022(5) 
C5 0.095(5) 0.049(4) 0.037(3) -0.004(3) 0.004(3) -0.012(3) 
C6 0.279(15) 0.071(6) 0.033(4) 0.010(4) -0.007(6) -0.025(7) 
C7 0.082(5) 0.095(6) 0.046(4) 0.002(4) -0.007(4) -0.011(4) 
C8 0.106(7) 0.128(8) 0.059(5) -0.008(5) -0.017(5) 0.011(6) 
C9 0.106(6) 0.068(5) 0.035(3) -0.002(3) 0.001(4) 0.004(4) 
C10 0.108(7) 0.105(7) 0.049(4) 0.005(4) 0.011(5) -0.024(5) 
C11 0.074(5) 0.088(5) 0.048(4) 0.000(4) 0.003(3) -0.025(4) 
C12 0.191(11) 0.077(6) 0.040(4) 0.000(4) -0.005(5) 0.017(6) 
C100 0.026(3) 0.025(3) 0.054(3) -0.004(2) 0.003(2) -0.003(2) 
C101 0.029(3) 0.028(3) 0.073(4) -0.001(3) 0.012(3) -0.005(2) 
C102 0.036(3) 0.033(3) 0.079(4) -0.012(3) 0.013(3) -0.007(2) 
C103 0.052(4) 0.029(3) 0.112(6) -0.017(4) 0.009(4) -0.009(3) 
C104 0.050(4) 0.025(3) 0.134(7) -0.004(4) 0.017(4) -0.011(3) 
C105 0.044(4) 0.031(3) 0.125(7) 0.014(4) 0.013(4) -0.004(3) 
C106 0.031(3) 0.034(3) 0.081(4) 0.009(3) 0.013(3) -0.005(2) 
C107 0.034(3) 0.036(3) 0.084(5) 0.021(3) 0.006(3) 0.005(2) 
C108 0.046(4) 0.072(5) 0.085(5) 0.035(4) -0.002(4) -0.015(3) 
C109 0.061(5) 0.097(6) 0.081(5) 0.048(5) 0.001(4) -0.001(4) 
C110 0.047(4) 0.071(5) 0.066(4) 0.021(4) -0.003(3) 0.004(3) 
C111 0.040(3) 0.045(3) 0.066(4) 0.016(3) 0.005(3) 0.005(3) 
C112 0.032(3) 0.035(3) 0.058(4) 0.012(3) 0.004(3) -0.001(2) 
C113 0.075(5) 0.110(7) 0.065(5) 0.018(5) -0.015(4) 0.007(5) 
C114 0.056(4) 0.030(3) 0.067(4) -0.018(3) 0.008(3) -0.017(3) 
C115 0.086(5) 0.054(4) 0.075(5) -0.026(4) 0.016(4) -0.009(4) 
C116 0.124(8) 0.077(6) 0.067(5) -0.032(4) 0.002(5) -0.014(5) 
C117 0.094(6) 0.085(6) 0.070(5) -0.015(4) -0.017(5) -0.017(5) 
C118 0.066(5) 0.063(4) 0.076(5) -0.016(4) -0.012(4) -0.009(4) 
C119 0.053(4) 0.042(3) 0.063(4) -0.015(3) 0.003(3) -0.012(3) 
C120 0.145(10) 0.134(9) 0.081(6) -0.009(6) -0.043(6) -0.008(7) 
C200 0.026(2) 0.019(2) 0.041(3) -0.003(2) 0.004(2) -0.0017(18) 
C201 0.027(3) 0.023(2) 0.045(3) 0.004(2) 0.002(2) 0.0009(19) 
C202 0.026(3) 0.033(3) 0.052(3) 0.003(2) -0.002(2) 0.002(2) 
C203 0.030(3) 0.051(3) 0.066(4) -0.007(3) -0.005(3) 0.000(2) 
C204 0.022(3) 0.054(4) 0.079(4) -0.011(3) 0.008(3) -0.006(2) 
C205 0.030(3) 0.049(3) 0.063(4) 0.000(3) 0.013(3) 0.002(2) 
C206 0.031(3) 0.035(3) 0.047(3) 0.005(2) 0.005(2) 0.003(2) 
C207 0.029(3) 0.042(3) 0.044(3) -0.003(2) 0.015(2) 0.002(2) 
C208 0.058(4) 0.044(3) 0.046(3) -0.001(3) 0.016(3) -0.004(3) 
C209 0.065(4) 0.050(4) 0.064(4) -0.017(3) 0.018(3) -0.015(3) 
C210 0.073(5) 0.071(5) 0.052(4) -0.021(3) 0.012(3) -0.015(4) 
C211 0.102(6) 0.078(5) 0.049(4) -0.005(4) 0.009(4) -0.011(5) 
C212 0.078(5) 0.055(4) 0.047(4) -0.001(3) 0.013(3) -0.015(3) 
C213 0.121(8) 0.108(7) 0.080(6) -0.038(5) 0.007(5) -0.026(6) 
C214 0.031(3) 0.036(3) 0.046(3) -0.005(2) -0.006(2) -0.006(2) 
C215 0.040(3) 0.065(4) 0.057(4) -0.001(3) -0.012(3) 0.005(3) 
C216 0.064(4) 0.092(5) 0.047(4) 0.000(4) -0.018(3) -0.001(4) 
C217 0.059(4) 0.080(5) 0.051(4) -0.019(3) -0.002(3) -0.002(4) 
C218 0.051(4) 0.058(4) 0.060(4) -0.014(3) 0.002(3) 0.007(3) 
C219 0.045(3) 0.049(3) 0.045(3) -0.001(3) -0.004(3) 0.005(3) 
C220 0.098(7) 0.124(8) 0.055(5) -0.026(5) 0.010(4) -0.005(6) 
C300 0.019(2) 0.027(2) 0.034(3) -0.001(2) 0.0034(19) -0.0047(18) 
C301 0.024(2) 0.025(2) 0.035(3) -0.003(2) -0.005(2) -0.0038(19) 
C302 0.029(3) 0.030(3) 0.038(3) -0.002(2) -0.003(2) -0.003(2) 
C303 0.048(3) 0.026(3) 0.047(3) 0.003(2) 0.000(3) -0.008(2) 
C304 0.052(3) 0.022(3) 0.065(4) -0.008(3) 0.004(3) 0.001(2) 
C305 0.037(3) 0.030(3) 0.052(3) -0.011(2) 0.006(2) 0.001(2) 
C306 0.026(2) 0.029(3) 0.040(3) -0.007(2) -0.003(2) 0.000(2) 
C307 0.030(3) 0.033(3) 0.041(3) -0.010(2) 0.008(2) 0.004(2) 
C308 0.032(3) 0.041(3) 0.049(3) -0.004(3) 0.003(2) -0.003(2) 
C309 0.042(3) 0.042(3) 0.079(5) -0.001(3) 0.019(3) -0.005(3) 
C310 0.094(6) 0.047(4) 0.067(5) -0.001(3) 0.039(4) -0.007(4) 
C311 0.117(7) 0.075(5) 0.041(4) -0.006(3) 0.021(4) -0.016(5) 
C312 0.072(4) 0.060(4) 0.046(4) -0.018(3) 0.007(3) -0.015(3) 
C313 0.039(3) 0.027(3) 0.039(3) 0.001(2) 0.002(2) -0.010(2) 
C314 0.042(3) 0.032(3) 0.046(3) 0.006(2) 0.002(2) -0.006(2) 
C315 0.048(3) 0.048(3) 0.052(4) 0.001(3) 0.013(3) 0.002(3) 
C316 0.061(4) 0.052(4) 0.047(4) -0.002(3) 0.016(3) -0.009(3) 
C317 0.072(4) 0.049(4) 0.040(3) 0.011(3) 0.007(3) -0.009(3) 
C318 0.050(3) 0.038(3) 0.046(3) 0.008(3) -0.001(3) -0.001(3) 
C319 0.088(6) 0.093(6) 0.058(4) 0.004(4) 0.028(4) -0.004(5) 
C320 0.162(10) 0.081(6) 0.091(7) 0.009(5) 0.065(7) -0.014(6) 
C400 0.028(2) 0.018(2) 0.037(3) -0.0005(19) 0.003(2) -0.0028(18) 
C401 0.027(2) 0.024(2) 0.035(3) -0.003(2) 0.002(2) -0.0014(19) 
C402 0.029(3) 0.030(3) 0.046(3) -0.009(2) -0.001(2) 0.000(2) 
C403 0.034(3) 0.042(3) 0.054(3) 0.000(3) -0.008(3) -0.001(2) 
C404 0.025(3) 0.041(3) 0.070(4) 0.000(3) 0.000(3) -0.006(2) 
C405 0.032(3) 0.033(3) 0.055(3) 0.000(2) 0.011(2) -0.006(2) 
C406 0.031(3) 0.028(3) 0.042(3) -0.005(2) 0.005(2) 0.002(2) 
C407 0.036(3) 0.027(3) 0.043(3) -0.001(2) 0.006(2) -0.009(2) 
C408 0.035(3) 0.029(3) 0.040(3) 0.000(2) 0.004(2) -0.005(2) 
C409 0.041(3) 0.030(3) 0.056(4) 0.003(2) 0.001(3) -0.003(2) 
C410 0.055(4) 0.040(3) 0.043(3) 0.007(3) 0.003(3) -0.004(3) 
C411 0.064(4) 0.046(3) 0.043(3) 0.005(3) 0.013(3) -0.006(3) 
C412 0.044(3) 0.039(3) 0.048(3) 0.000(3) 0.014(3) 0.003(2) 
C413 0.025(3) 0.039(3) 0.039(3) 0.003(2) -0.004(2) 0.005(2) 
C414 0.063(4) 0.052(4) 0.048(4) 0.000(3) -0.007(3) -0.001(3) 
C415 0.080(5) 0.084(5) 0.037(3) 0.012(3) -0.001(3) 0.002(4) 
C416 0.050(4) 0.076(5) 0.057(4) 0.031(4) -0.003(3) 0.000(3) 
C417 0.052(4) 0.052(4) 0.071(5) 0.016(3) -0.015(3) -0.012(3) 
C418 0.042(3) 0.042(3) 0.044(3) 0.009(3) -0.009(2) -0.006(2) 
C419 0.096(6) 0.115(7) 0.082(6) 0.058(5) -0.009(5) -0.018(5) 
C420 0.079(5) 0.062(4) 0.055(4) 0.016(3) 0.002(4) 0.004(4) 
Fe1 0.0289(4) 0.0255(4) 0.0280(4) 0.0022(3) 0.0010(3) -0.0023(3) 
Fe2 0.0249(4) 0.0266(4) 0.0272(4) -0.0027(3) 0.0023(3) -0.0044(3) 
N1 0.037(2) 0.040(3) 0.031(2) -0.0073(19) 0.0041(18) -0.0082(19) 
N2 0.45(2) 0.088(6) 0.050(5) 0.002(4) -0.002(8) -0.041(9) 
N3 0.042(3) 0.040(3) 0.030(2) 0.0022(19) -0.003(2) -0.005(2) 
N4 0.320(15) 0.099(6) 0.045(4) 0.007(4) 0.005(6) 0.013(8) 
O1 0.0340(19) 0.0254(17) 0.048(2) -0.0043(16) 0.0081(16) -0.0034(14) 
O2 0.0322(19) 0.0265(17) 0.046(2) 0.0006(15) 0.0030(16) -0.0009(14) 
O3 0.0239(17) 0.0304(18) 0.0377(19) -0.0026(15) 0.0006(15) -0.0019(14) 
O4 0.0302(18) 0.0282(18) 0.041(2) 0.0051(15) 0.0031(15) -0.0023(14) 
O5 0.0294(18) 0.0244(17) 0.0342(18) 0.0012(14) 0.0011(14) -0.0029(13) 
O6 0.0268(17) 0.0279(17) 0.0328(18) -0.0036(14) -0.0013(14) -0.0025(13) 
O7 0.0252(17) 0.0285(17) 0.0372(19) -0.0029(14) 0.0023(14) -0.0046(13) 
O8 0.0305(18) 0.0271(17) 0.0349(19) -0.0028(14) -0.0008(15) -0.0050(14) 
 
_geom_special_details 
; 
 All esds (except the esd in the dihedral angle between two l.s. planes) 
 are estimated using the full covariance matrix.  The cell esds are taken 
 into account individually in the estimation of esds in distances, angles 
 and torsion angles; correlations between esds in cell parameters are only 
 used when they are defined by crystal symmetry.  An approximate (isotropic) 
 treatment of cell esds is used for estimating esds involving l.s. planes. 
; 
 
loop_ 
 _geom_bond_atom_site_label_1 
 _geom_bond_atom_site_label_2 
 _geom_bond_distance 
 _geom_bond_site_symmetry_2 
 _geom_bond_publ_flag 
C1 N1 1.339(7) . ? 
C1 C2 1.377(8) . ? 
C2 C3 1.347(9) . ? 
C3 C4 1.380(10) . ? 
C3 C6 1.438(10) . ? 
C4 C5 1.398(9) . ? 
C5 N1 1.311(7) . ? 
C6 N2 1.129(10) . ? 
C7 N3 1.326(8) . ? 
C7 C8 1.388(11) . ? 
C8 C9 1.407(12) . ? 
C9 C10 1.304(11) . ? 
C9 C12 1.438(10) . ? 
C10 C11 1.387(10) . ? 
C11 N3 1.332(8) . ? 
C12 N4 1.165(10) . ? 
C100 O1 1.252(6) . ? 
C100 O2 1.267(6) . ? 
C100 C101 1.510(7) . ? 
C101 C106 1.415(8) . ? 
C101 C102 1.414(8) . ? 
C102 C103 1.394(8) . ? 
C102 C114 1.492(9) . ? 
C103 C104 1.394(11) . ? 
C104 C105 1.363(11) . ? 
C105 C106 1.400(8) . ? 
C106 C107 1.478(9) . ? 
C107 C108 1.387(9) . ? 
C107 C112 1.397(8) . ? 
C108 C109 1.359(11) . ? 
C109 C110 1.390(10) . ? 
C110 C111 1.375(9) . ? 
C110 C113 1.507(10) . ? 
C111 C112 1.369(9) . ? 
C114 C119 1.379(9) . ? 
C114 C115 1.393(9) . ? 
C115 C116 1.350(11) . ? 
C116 C117 1.400(12) . ? 
C117 C118 1.389(11) . ? 
C117 C120 1.492(12) . ? 
C118 C119 1.389(9) . ? 
C200 O4 1.251(6) . ? 
C200 O3 1.263(6) . ? 
C200 C201 1.511(6) . ? 
C201 C202 1.405(7) . ? 
C201 C206 1.410(7) . ? 
C202 C203 1.401(7) . ? 
C202 C214 1.485(7) . ? 
C203 C204 1.382(8) . ? 
C204 C205 1.376(8) . ? 
C205 C206 1.408(7) . ? 
C206 C207 1.490(8) . ? 
C207 C212 1.375(8) . ? 
C207 C208 1.385(8) . ? 
C208 C209 1.364(9) . ? 
C209 C210 1.382(10) . ? 
C210 C211 1.377(10) . ? 
C210 C213 1.526(10) . ? 
C211 C212 1.382(10) . ? 
C214 C215 1.383(8) . ? 
C214 C219 1.382(7) . ? 
C215 C216 1.373(9) . ? 
C216 C217 1.375(10) . ? 
C217 C218 1.383(9) . ? 
C217 C220 1.513(9) . ? 
C218 C219 1.373(8) . ? 
C300 O6 1.250(5) . ? 
C300 O5 1.263(5) . ? 
C300 C301 1.512(6) . ? 
C301 C302 1.407(7) . ? 
C301 C306 1.422(7) . ? 
C302 C303 1.402(7) . ? 
C302 C313 1.486(7) . ? 
C303 C304 1.379(8) . ? 
C304 C305 1.371(8) . ? 
C305 C306 1.386(7) . ? 
C306 C307 1.482(7) . ? 
C307 C308 1.385(7) . ? 
C307 C312 1.387(8) . ? 
C308 C309 1.369(8) . ? 
C309 C310 1.395(10) . ? 
C310 C311 1.360(11) . ? 
C310 C320 1.503(10) . ? 
C311 C312 1.384(9) . ? 
C313 C318 1.379(7) . ? 
C313 C314 1.397(7) . ? 
C314 C315 1.376(8) . ? 
C315 C316 1.385(9) . ? 
C316 C317 1.376(9) . ? 
C316 C319 1.521(9) . ? 
C317 C318 1.381(8) . ? 
C400 O8 1.252(6) . ? 
C400 O7 1.264(6) . ? 
C400 C401 1.519(6) . ? 
C401 C406 1.394(7) . ? 
C401 C402 1.416(7) . ? 
C402 C403 1.395(7) . ? 
C402 C413 1.491(7) . ? 
C403 C404 1.379(8) . ? 
C404 C405 1.373(8) . ? 
C405 C406 1.394(7) . ? 
C406 C407 1.499(7) . ? 
C407 C408 1.388(7) . ? 
C407 C412 1.389(7) . ? 
C408 C409 1.376(7) . ? 
C409 C410 1.378(8) . ? 
C410 C411 1.388(8) . ? 
C410 C420 1.513(8) . ? 
C411 C412 1.380(8) . ? 
C413 C418 1.383(7) . ? 
C413 C414 1.384(8) . ? 
C414 C415 1.377(9) . ? 
C415 C416 1.383(10) . ? 
C416 C417 1.376(10) . ? 
C416 C419 1.527(9) . ? 
C417 C418 1.385(8) . ? 
Fe1 O5 2.018(3) . ? 
Fe1 O2 2.032(3) . ? 
Fe1 N3 2.089(4) . ? 
Fe1 O4 2.132(3) . ? 
Fe1 O8 2.132(3) . ? 
Fe1 Fe2 2.7753(10) . ? 
Fe2 O3 2.005(3) . ? 
Fe2 O7 2.011(3) . ? 
Fe2 N1 2.100(4) . ? 
Fe2 O1 2.130(3) . ? 
Fe2 O6 2.146(3) . ? 
O1D C1D 1.4200 . ? 
O1D C4D 1.4200 . ? 
C1D C2D 1.4200 . ? 
C2D C3D 1.4200 . ? 
C3D C4D 1.4200 . ? 
O1S C4S 1.4200 . ? 
O1S C1S 1.4200 . ? 
C1S C2S 1.4200 . ? 
C2S C3S 1.4200 . ? 
C3S C4S 1.4200 . ? 
O1T C1T 1.4200 . ? 
O1T C4T 1.4200 . ? 
C1T C2T 1.4200 . ? 
C2T C3T 1.4200 . ? 
C3T C4T 1.4200 . ? 
O1U C4U 1.4200 . ? 
O1U C1U 1.4200 . ? 
C1U C2U 1.4200 . ? 
C2U C3U 1.4200 . ? 
C3U C4U 1.4200 . ? 
 
loop_ 
 _geom_angle_atom_site_label_1 
 _geom_angle_atom_site_label_2 
 _geom_angle_atom_site_label_3 
 _geom_angle 
 _geom_angle_site_symmetry_1 
 _geom_angle_site_symmetry_3 
 _geom_angle_publ_flag 
N1 C1 C2 123.5(6) . . ? 
C3 C2 C1 118.7(6) . . ? 
C2 C3 C4 119.0(7) . . ? 
C2 C3 C6 120.3(7) . . ? 
C4 C3 C6 120.7(7) . . ? 
C3 C4 C5 119.0(6) . . ? 
N1 C5 C4 122.0(6) . . ? 
N2 C6 C3 176.6(10) . . ? 
N3 C7 C8 123.2(8) . . ? 
C7 C8 C9 117.9(8) . . ? 
C10 C9 C8 118.4(7) . . ? 
C10 C9 C12 120.9(9) . . ? 
C8 C9 C12 120.8(9) . . ? 
C9 C10 C11 120.9(8) . . ? 
N3 C11 C10 122.7(7) . . ? 
N4 C12 C9 176.7(10) . . ? 
O1 C100 O2 124.8(4) . . ? 
O1 C100 C101 118.8(5) . . ? 
O2 C100 C101 116.5(5) . . ? 
C106 C101 C102 120.2(5) . . ? 
C106 C101 C100 121.0(5) . . ? 
C102 C101 C100 118.9(5) . . ? 
C103 C102 C101 118.8(6) . . ? 
C103 C102 C114 115.7(6) . . ? 
C101 C102 C114 125.5(5) . . ? 
C102 C103 C104 120.4(7) . . ? 
C105 C104 C103 120.9(6) . . ? 
C104 C105 C106 120.8(7) . . ? 
C105 C106 C101 118.8(6) . . ? 
C105 C106 C107 116.4(6) . . ? 
C101 C106 C107 124.7(5) . . ? 
C108 C107 C112 116.7(6) . . ? 
C108 C107 C106 121.1(6) . . ? 
C112 C107 C106 121.9(6) . . ? 
C109 C108 C107 121.5(7) . . ? 
C108 C109 C110 122.0(7) . . ? 
C111 C110 C109 116.5(7) . . ? 
C111 C110 C113 121.6(7) . . ? 
C109 C110 C113 121.9(7) . . ? 
C112 C111 C110 122.2(6) . . ? 
C111 C112 C107 121.0(6) . . ? 
C119 C114 C115 117.8(7) . . ? 
C119 C114 C102 121.3(6) . . ? 
C115 C114 C102 120.7(6) . . ? 
C116 C115 C114 121.3(8) . . ? 
C115 C116 C117 121.5(8) . . ? 
C118 C117 C116 117.8(8) . . ? 
C118 C117 C120 120.6(9) . . ? 
C116 C117 C120 121.5(9) . . ? 
C119 C118 C117 120.1(7) . . ? 
C114 C119 C118 121.5(6) . . ? 
O4 C200 O3 125.1(4) . . ? 
O4 C200 C201 118.9(4) . . ? 
O3 C200 C201 115.9(4) . . ? 
C202 C201 C206 119.9(5) . . ? 
C202 C201 C200 120.8(4) . . ? 
C206 C201 C200 119.3(4) . . ? 
C203 C202 C201 119.6(5) . . ? 
C203 C202 C214 116.0(5) . . ? 
C201 C202 C214 124.4(4) . . ? 
C204 C203 C202 120.3(6) . . ? 
C205 C204 C203 120.5(5) . . ? 
C204 C205 C206 120.9(5) . . ? 
C205 C206 C201 118.8(5) . . ? 
C205 C206 C207 117.0(5) . . ? 
C201 C206 C207 124.1(5) . . ? 
C212 C207 C208 116.6(5) . . ? 
C212 C207 C206 121.4(5) . . ? 
C208 C207 C206 121.9(5) . . ? 
C209 C208 C207 122.3(6) . . ? 
C208 C209 C210 121.0(6) . . ? 
C211 C210 C209 117.2(6) . . ? 
C211 C210 C213 121.4(7) . . ? 
C209 C210 C213 121.3(7) . . ? 
C210 C211 C212 121.4(7) . . ? 
C207 C212 C211 121.4(6) . . ? 
C215 C214 C219 116.8(5) . . ? 
C215 C214 C202 120.9(5) . . ? 
C219 C214 C202 122.1(5) . . ? 
C216 C215 C214 121.7(6) . . ? 
C215 C216 C217 121.3(6) . . ? 
C216 C217 C218 117.4(6) . . ? 
C216 C217 C220 122.4(7) . . ? 
C218 C217 C220 120.1(7) . . ? 
C219 C218 C217 121.2(6) . . ? 
C218 C219 C214 121.5(6) . . ? 
O6 C300 O5 125.2(4) . . ? 
O6 C300 C301 118.3(4) . . ? 
O5 C300 C301 116.5(4) . . ? 
C302 C301 C306 119.8(4) . . ? 
C302 C301 C300 119.8(4) . . ? 
C306 C301 C300 120.4(4) . . ? 
C303 C302 C301 118.7(5) . . ? 
C303 C302 C313 116.6(4) . . ? 
C301 C302 C313 124.6(4) . . ? 
C304 C303 C302 121.1(5) . . ? 
C305 C304 C303 120.0(5) . . ? 
C304 C305 C306 121.6(5) . . ? 
C305 C306 C301 118.8(5) . . ? 
C305 C306 C307 117.3(4) . . ? 
C301 C306 C307 123.8(4) . . ? 
C308 C307 C312 117.1(5) . . ? 
C308 C307 C306 121.9(5) . . ? 
C312 C307 C306 121.0(5) . . ? 
C309 C308 C307 121.8(6) . . ? 
C308 C309 C310 121.0(6) . . ? 
C311 C310 C309 117.2(6) . . ? 
C311 C310 C320 122.7(8) . . ? 
C309 C310 C320 120.0(8) . . ? 
C310 C311 C312 122.3(7) . . ? 
C311 C312 C307 120.6(6) . . ? 
C318 C313 C314 117.7(5) . . ? 
C318 C313 C302 121.1(5) . . ? 
C314 C313 C302 121.0(5) . . ? 
C315 C314 C313 120.8(5) . . ? 
C314 C315 C316 120.9(6) . . ? 
C317 C316 C315 118.3(5) . . ? 
C317 C316 C319 121.6(6) . . ? 
C315 C316 C319 120.0(6) . . ? 
C316 C317 C318 121.0(6) . . ? 
C313 C318 C317 121.3(6) . . ? 
O8 C400 O7 125.0(4) . . ? 
O8 C400 C401 118.5(4) . . ? 
O7 C400 C401 116.5(4) . . ? 
C406 C401 C402 119.9(4) . . ? 
C406 C401 C400 121.4(4) . . ? 
C402 C401 C400 118.8(4) . . ? 
C403 C402 C401 118.7(5) . . ? 
C403 C402 C413 116.8(5) . . ? 
C401 C402 C413 124.4(4) . . ? 
C404 C403 C402 121.3(5) . . ? 
C405 C404 C403 119.5(5) . . ? 
C404 C405 C406 121.4(5) . . ? 
C401 C406 C405 119.2(5) . . ? 
C401 C406 C407 123.9(4) . . ? 
C405 C406 C407 116.8(5) . . ? 
C408 C407 C412 117.8(5) . . ? 
C408 C407 C406 122.0(5) . . ? 
C412 C407 C406 120.0(5) . . ? 
C409 C408 C407 120.7(5) . . ? 
C408 C409 C410 121.9(5) . . ? 
C409 C410 C411 117.4(5) . . ? 
C409 C410 C420 121.2(6) . . ? 
C411 C410 C420 121.3(5) . . ? 
C412 C411 C410 121.2(5) . . ? 
C411 C412 C407 120.9(5) . . ? 
C418 C413 C414 117.8(5) . . ? 
C418 C413 C402 120.9(5) . . ? 
C414 C413 C402 121.1(5) . . ? 
C415 C414 C413 121.0(6) . . ? 
C414 C415 C416 121.3(6) . . ? 
C417 C416 C415 117.8(6) . . ? 
C417 C416 C419 120.7(7) . . ? 
C415 C416 C419 121.4(7) . . ? 
C416 C417 C418 121.1(6) . . ? 
C413 C418 C417 121.0(6) . . ? 
O5 Fe1 O2 158.30(14) . . ? 
O5 Fe1 N3 102.14(15) . . ? 
O2 Fe1 N3 99.56(15) . . ? 
O5 Fe1 O4 88.11(13) . . ? 
O2 Fe1 O4 89.70(13) . . ? 
N3 Fe1 O4 96.80(15) . . ? 
O5 Fe1 O8 89.53(12) . . ? 
O2 Fe1 O8 87.76(13) . . ? 
N3 Fe1 O8 96.23(15) . . ? 
O4 Fe1 O8 166.97(13) . . ? 
O5 Fe1 Fe2 80.42(9) . . ? 
O2 Fe1 Fe2 77.87(10) . . ? 
N3 Fe1 Fe2 177.23(12) . . ? 
O4 Fe1 Fe2 84.29(9) . . ? 
O8 Fe1 Fe2 82.68(9) . . ? 
O3 Fe2 O7 158.06(14) . . ? 
O3 Fe2 N1 100.70(15) . . ? 
O7 Fe2 N1 101.21(15) . . ? 
O3 Fe2 O1 90.00(13) . . ? 
O7 Fe2 O1 87.85(13) . . ? 
N1 Fe2 O1 98.31(15) . . ? 
O3 Fe2 O6 87.39(12) . . ? 
O7 Fe2 O6 89.88(12) . . ? 
N1 Fe2 O6 94.54(15) . . ? 
O1 Fe2 O6 167.15(13) . . ? 
O3 Fe2 Fe1 78.16(10) . . ? 
O7 Fe2 Fe1 79.90(10) . . ? 
N1 Fe2 Fe1 176.71(12) . . ? 
O1 Fe2 Fe1 84.80(10) . . ? 
O6 Fe2 Fe1 82.34(9) . . ? 
C5 N1 C1 117.8(5) . . ? 
C5 N1 Fe2 122.0(4) . . ? 
C1 N1 Fe2 120.2(4) . . ? 
C7 N3 C11 116.6(6) . . ? 
C7 N3 Fe1 121.5(4) . . ? 
C11 N3 Fe1 121.8(4) . . ? 
C100 O1 Fe2 117.0(3) . . ? 
C100 O2 Fe1 130.0(3) . . ? 
C200 O3 Fe2 130.2(3) . . ? 
C200 O4 Fe1 116.6(3) . . ? 
C300 O5 Fe1 127.5(3) . . ? 
C300 O6 Fe2 119.0(3) . . ? 
C400 O7 Fe2 127.8(3) . . ? 
C400 O8 Fe1 118.8(3) . . ? 
C1D O1D C4D 108.0 . . ? 
O1D C1D C2D 108.0 . . ? 
C3D C2D C1D 108.0 . . ? 
C2D C3D C4D 108.0 . . ? 
C3D C4D O1D 108.0 . . ? 
C4S O1S C1S 108.0 . . ? 
C2S C1S O1S 108.0 . . ? 
C1S C2S C3S 108.0 . . ? 
C2S C3S C4S 108.0 . . ? 
O1S C4S C3S 108.0 . . ? 
C1T O1T C4T 108.0 . . ? 
C2T C1T O1T 108.0 . . ? 
C1T C2T C3T 108.0 . . ? 
C4T C3T C2T 108.0 . . ? 
O1T C4T C3T 108.0 . . ? 
C4U O1U C1U 108.0 . . ? 
C2U C1U O1U 108.0 . . ? 
C3U C2U C1U 108.0 . . ? 
C2U C3U C4U 108.0 . . ? 
C3U C4U O1U 108.0 . . ? 
 
_diffrn_measured_fraction_theta_max    0.991 
_diffrn_reflns_theta_full              25.00 
_diffrn_measured_fraction_theta_full   0.991 
_refine_diff_density_max    1.226 
_refine_diff_density_min   -0.584 
_refine_diff_density_rms    0.121 
